# Supplementary material
Source: ML conference proceedings conference paper supplement (https://openreview.net/forum?id=EGjvMcKrrl)

Train Accuracy

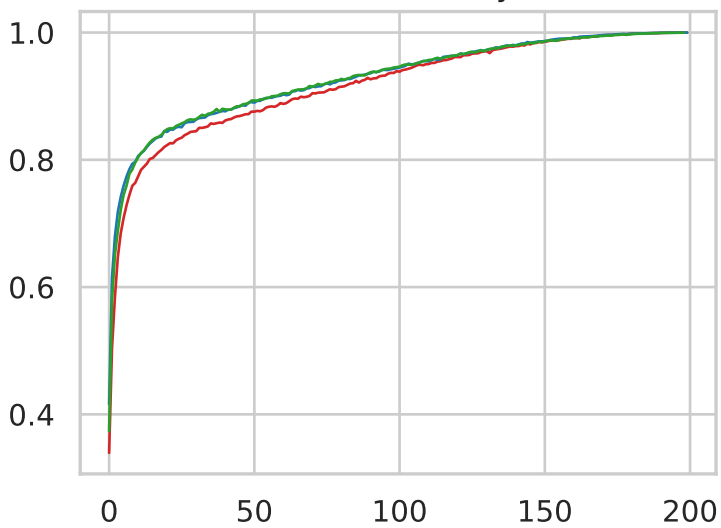

Val Accuracy

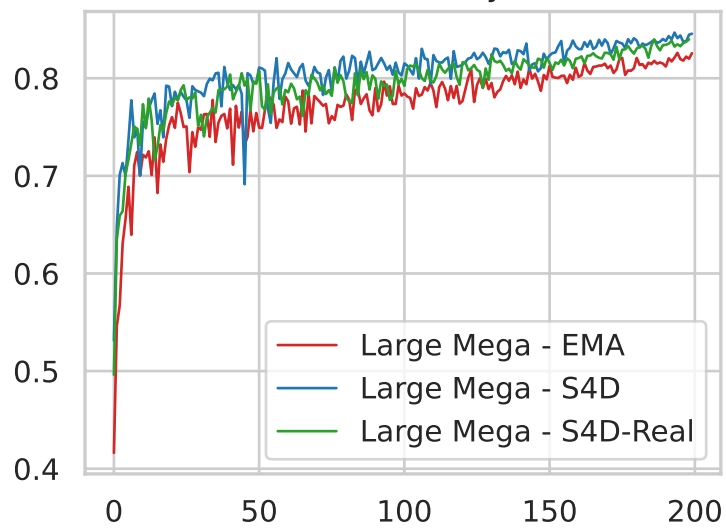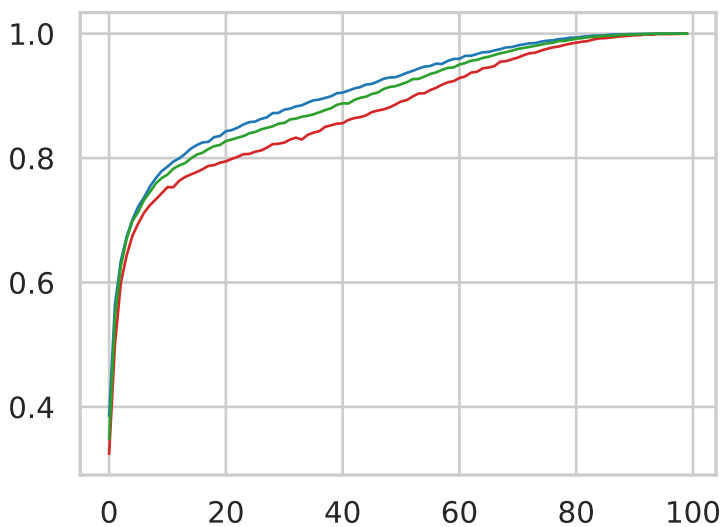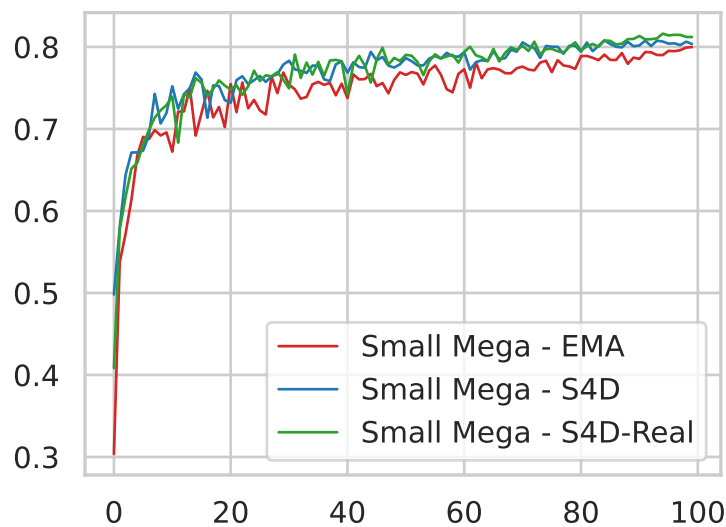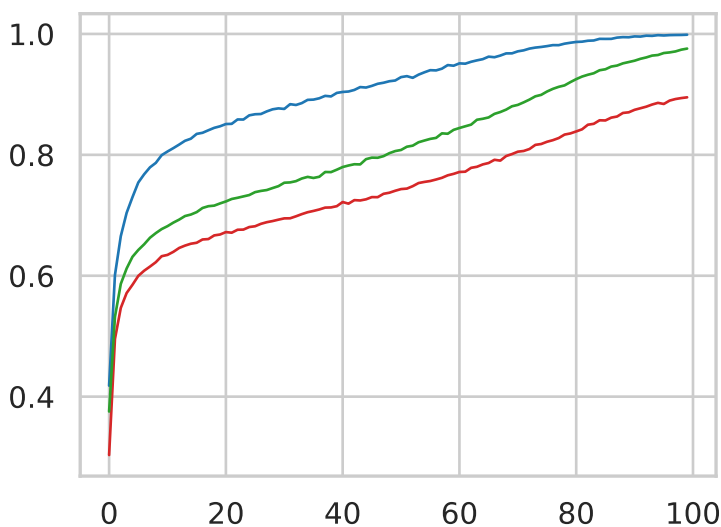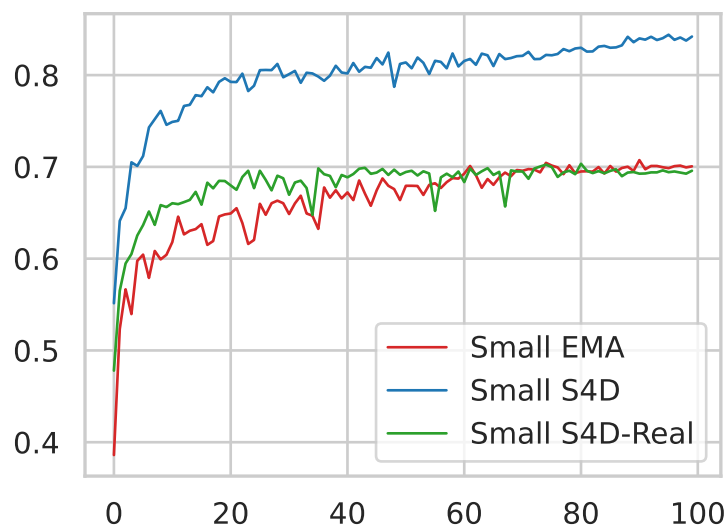

Supplement: supplementary_material [file attachment]

# Train Accuracy

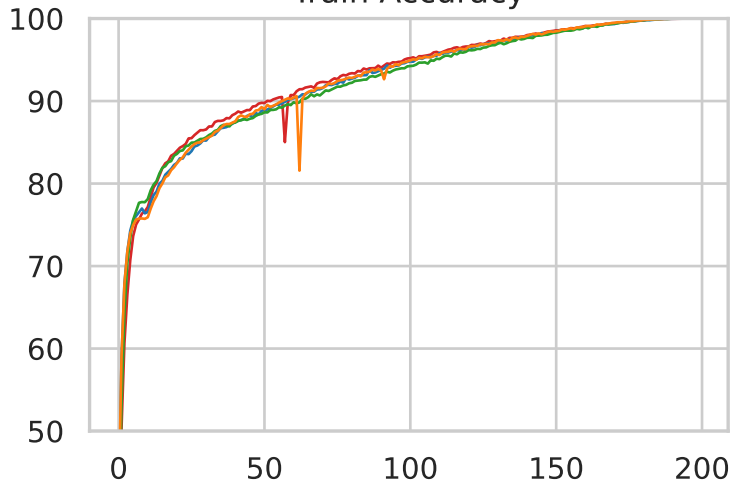

# Val Accuracy

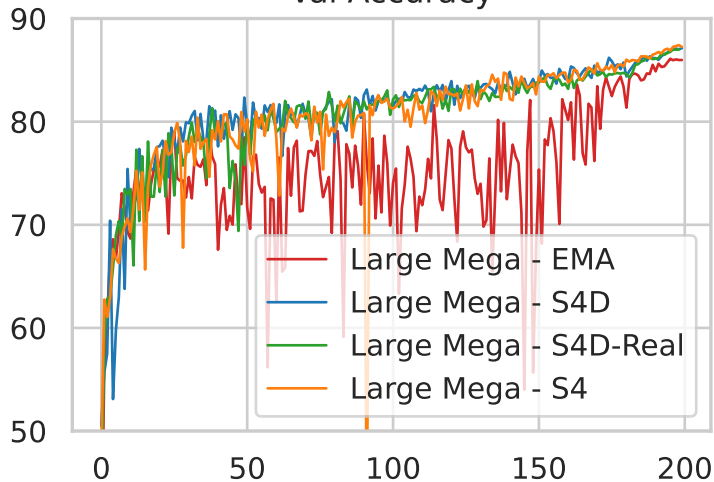

Supplement: supplementary_material [file attachment]
